# Supplementary material for: Atrial epicardial adipose tissue abundantly secretes myeloperoxidase and activates atrial fibroblasts in patients with atrial fibrillation
Source: Springer Nature journal article supplement (doi:10.1186/s12967-023-04231-2), 2023-06-06
Supplement: MOESM1 [file 25455668]

**Supplementary data:** Epicardial adipose tissue abundantly secretes myeloperoxidase and activates atrial fibroblasts in patients with atrial fibrillation

**Supplemental figure 1.** Gel image(s) and slicing scheme(s) of EAT secretome and EAT samples

**Supplemental figure 2.** MPO quantification in predefined epicardial layers, explanatory figure

**Supplemental figure 3a,b.** Unsupervised clustering of EAT secretome and EAT proteomes

**Supplemental figure 4.** Similar differentially expressed proteins in EAT, EAT secretome and myocardium

**Supplemental figure 5.** MPO co-localizes with fibrofatty strands that penetrate the myocardium in persistent AF patients

**Supplemental figure 6a,b.** Extravascularly localized EAT MPO and NETs

**Supplemental table 1.** Gene primer-sets

**Supplemental table 2.** Top 50 most differentially expressed proteins in AF EAT secretome

**Supplemental table 3.** Top 50 most differentially expressed proteins in AF EAT

**Supplemental table 4.** Patient characteristics: EAT secretome - fibroblast culture study

**Figure 1.** Gel image(s) and slicing scheme(s) of EAT secretome and EAT samples

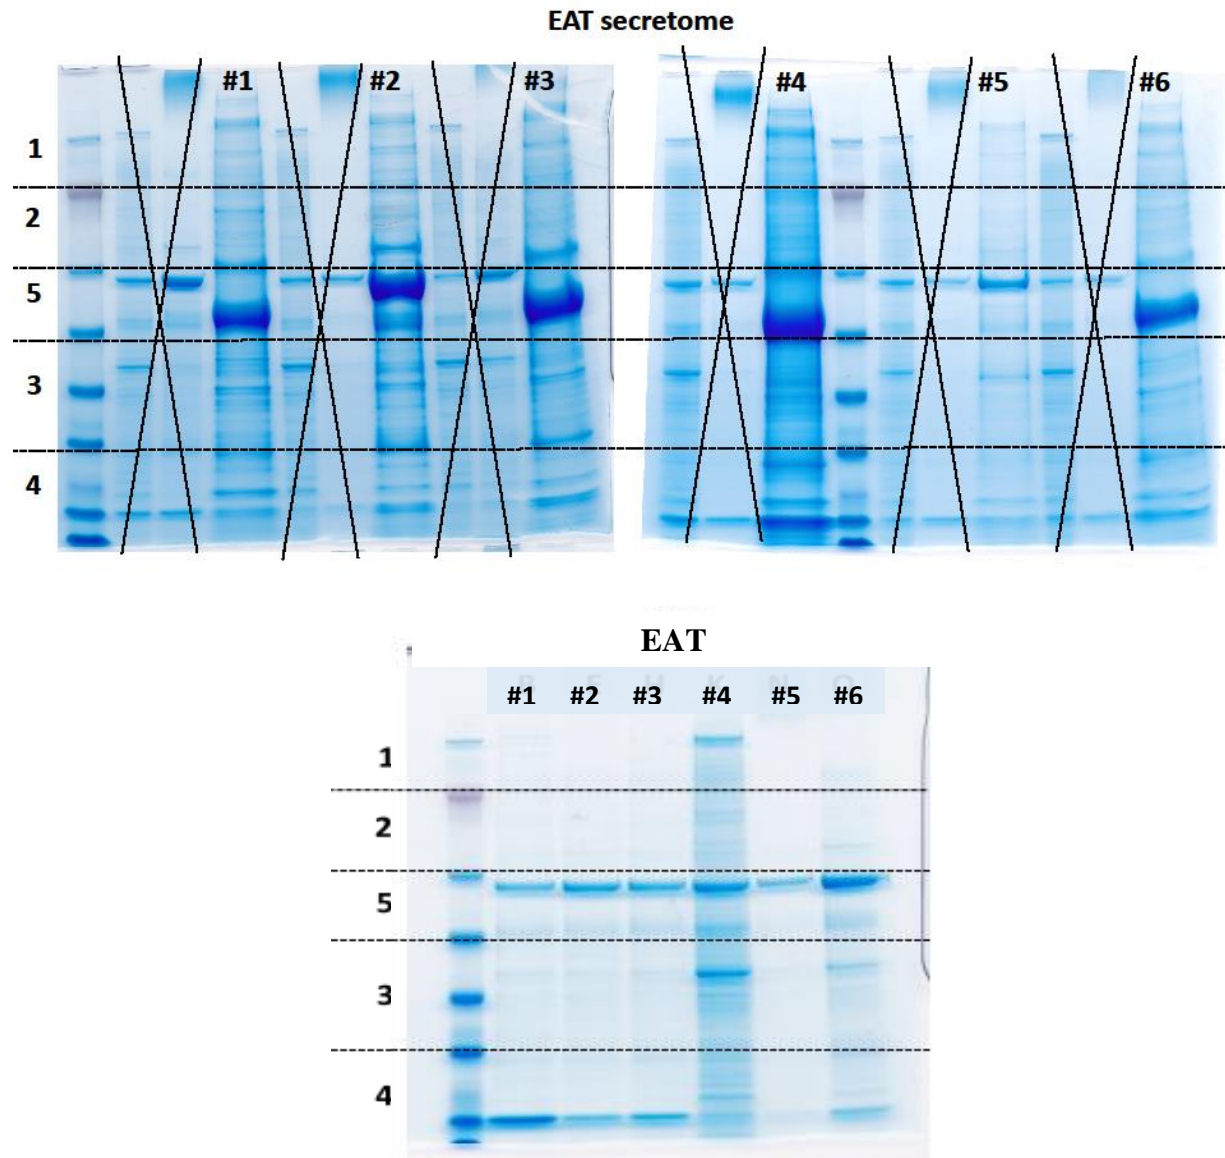

The marker was loaded in the first lane. In lane #1,2,3 samples from patients without, and in lane #4,5,6 samples from patients with persistent AF were loaded.

**Figure 2:** MPO quantification in predefined epicardial layers, explanatory figure

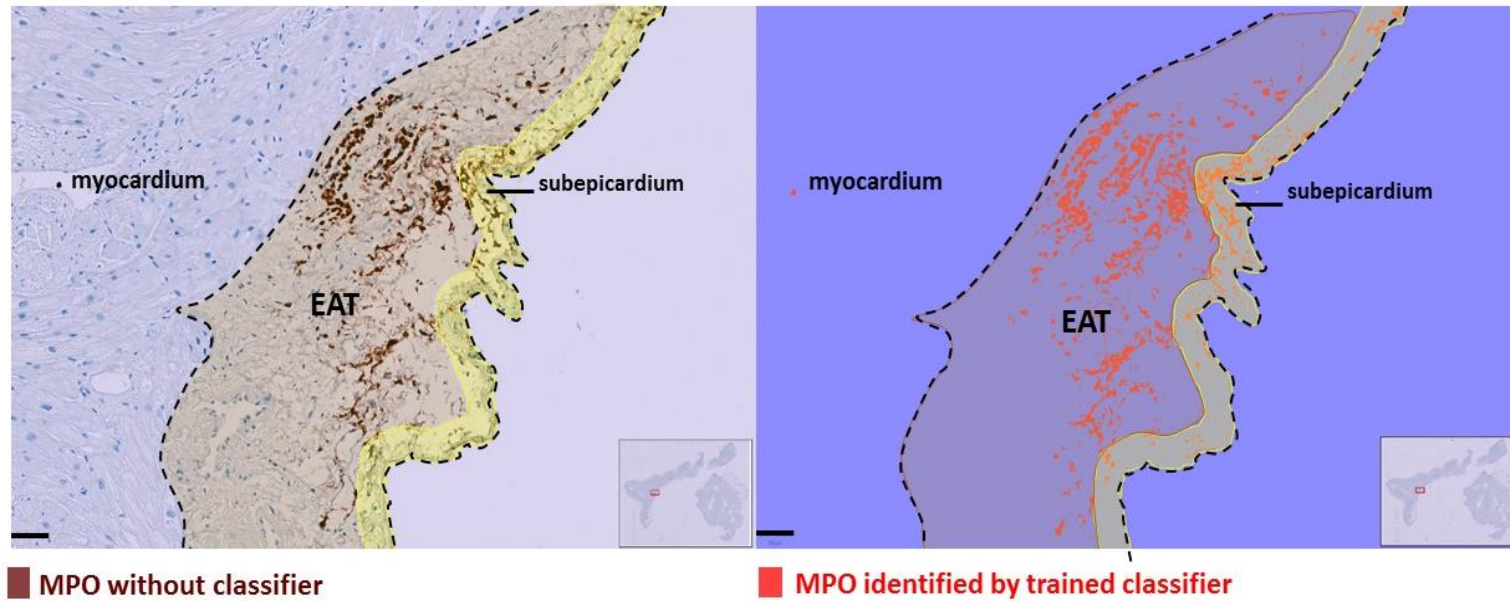

Immunohistochemical MPO staining in EAT from an AF patient. Left: MPO identification without trained classifier, right: identification with classifier. EAT, epicardial adipose tissue. Yellow: subepicardial region; orange: EAT

**Figure 3a,b.** Unsupervised clustering of EAT secretome and EAT proteomes

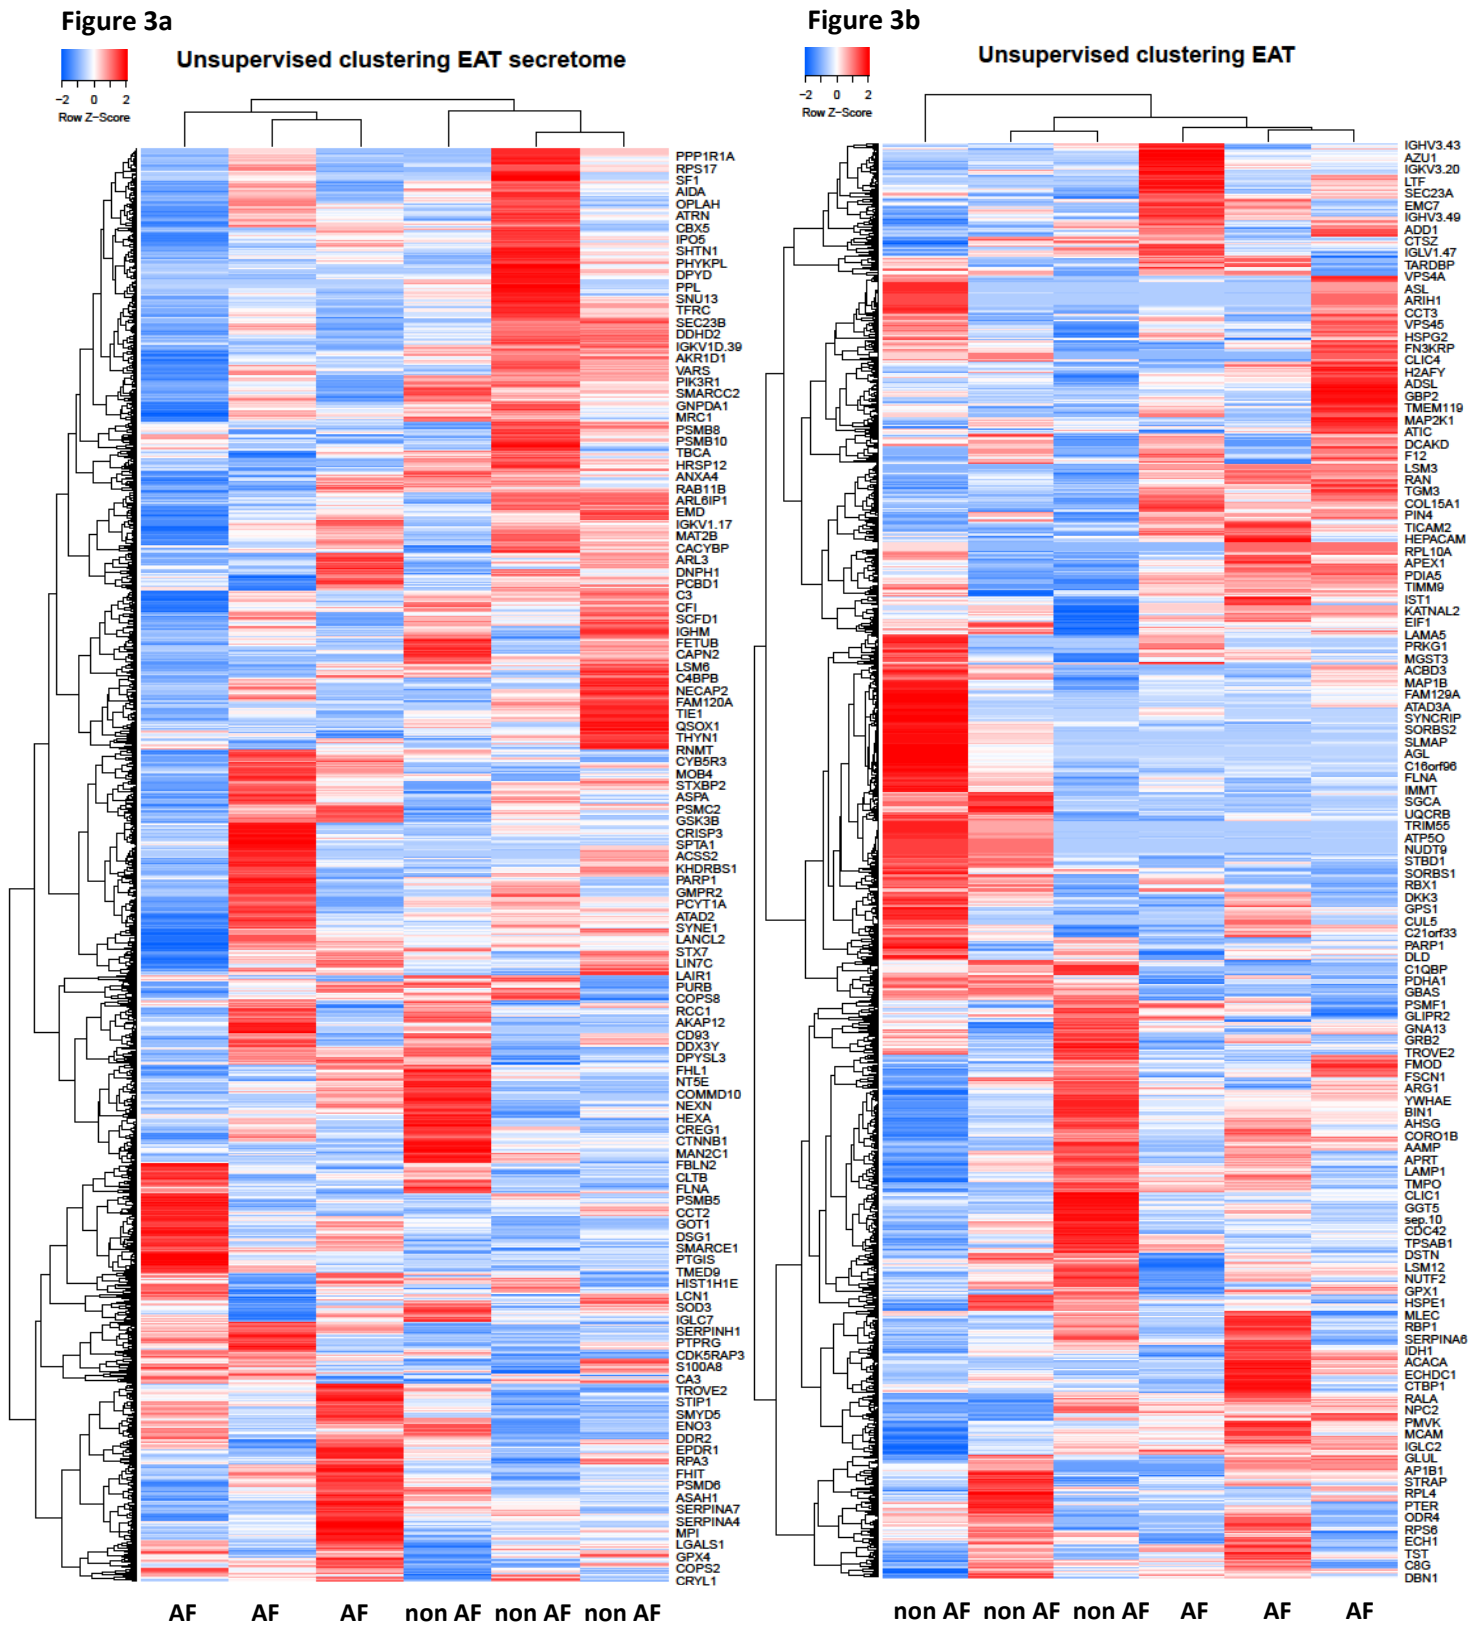

Unsupervised hierarchical clustering of all identified proteins (y-axis) and clustering of patient phenotype in EAT secretome (a) and EAT (b). Data is grouped by similar protein expression levels, calculated by average linkage with Pearson distance calculation. Heatmap colors represent relative increased or decreased protein expression, as indicated by the z score.

**Figure 4.** Similar differentially expressed proteins in EAT, EAT secretome and myocardium

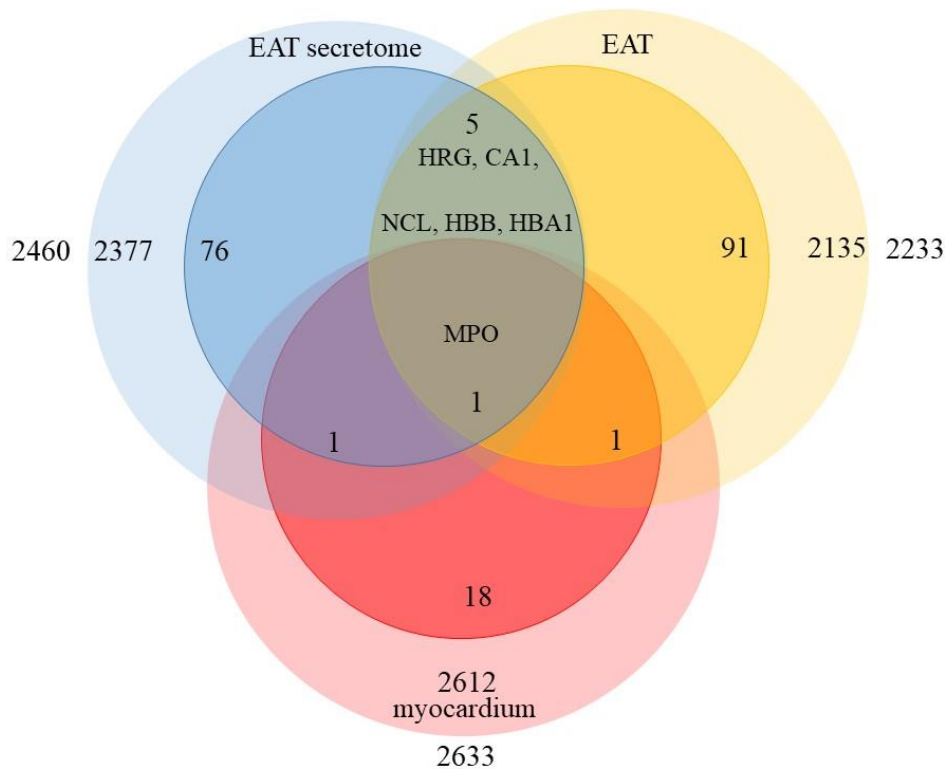

The smaller circles indicate differentially expressed proteins  $p < 0.01$  in EAT secretome (blue), EAT (yellow), and myocardium (red) of the same 6 patients, identified by LC-MS/MS. Six similar proteins were differentially expressed in both EAT secretome and EAT. All were increased in both EAT and in EAT secretome, except for NCL, nucleolin. MPO was the only protein differentially expressed in AF versus non AF in all tissue types. HRG, Histidine-rich glycoprotein; MPO, myeloperoxidase; CA1, carbonic anhydrase 1; HBB, hemoglobin subunit beta; HBA1, haemoglobin A1

**Figure 5.** MPO co-localization with fibrofatty strands that penetrate the myocardium

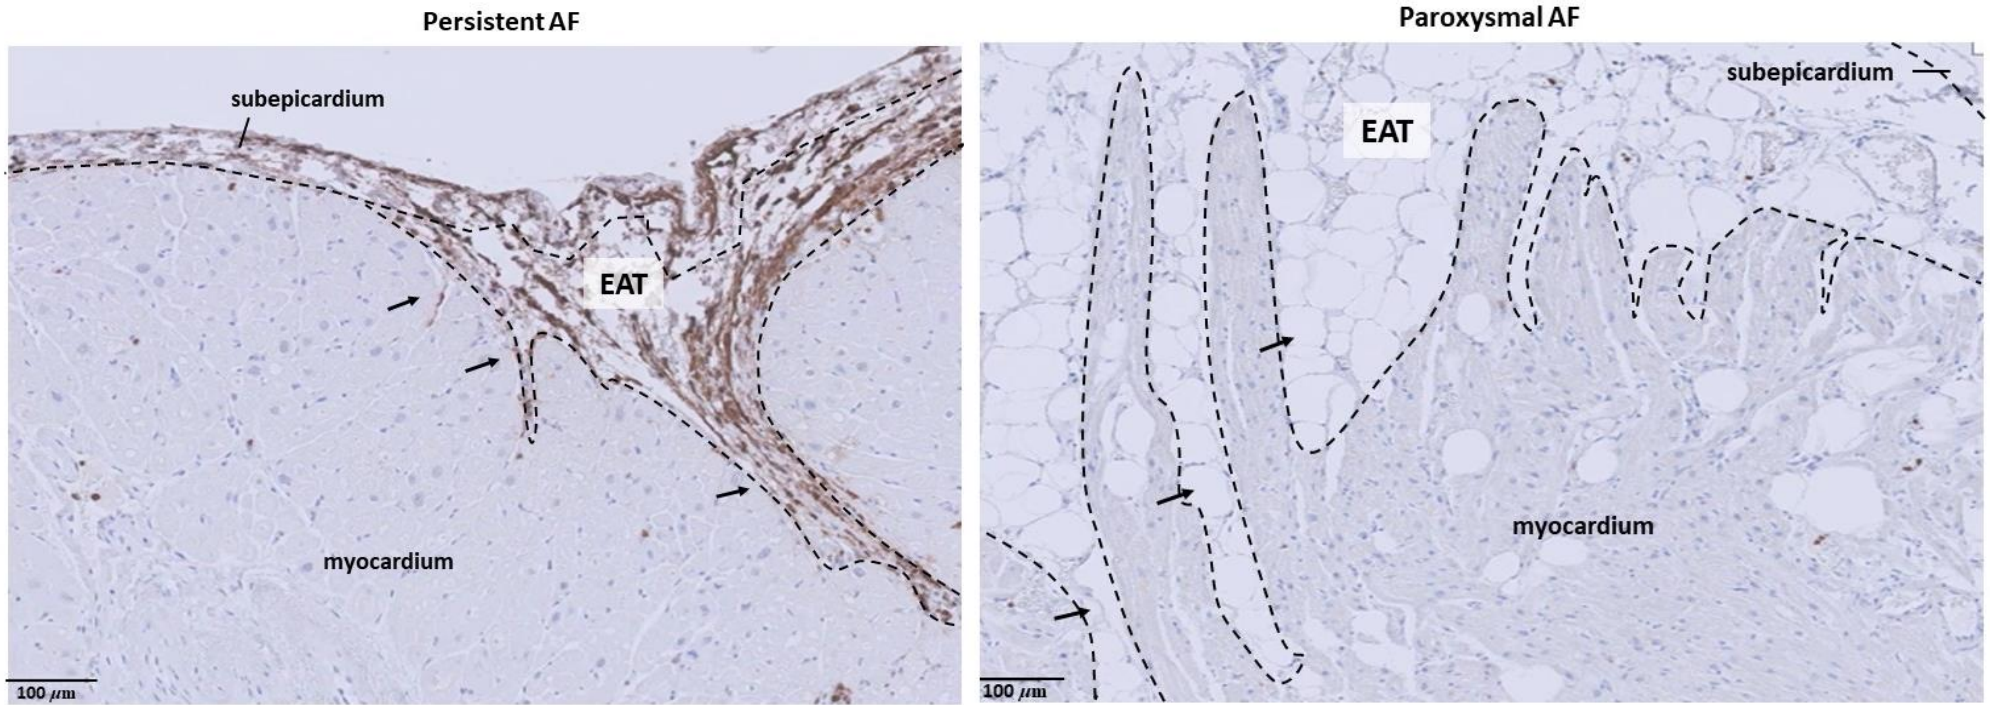

MPO co-localizes with fibrofatty strands that infiltrate into the myocardium in persistent AF (left) but not in paroxysmal AF (right). MPO-fibrofatty strands were present in 8/9 patients with persistent AF, in none with paroxysmal AF, in 5/15 with future onset AF and in 3/14 without AF. Arrows indicate fibrofatty infiltrates.

**Figure 6a,b.** EAT MPO source and NETs localization

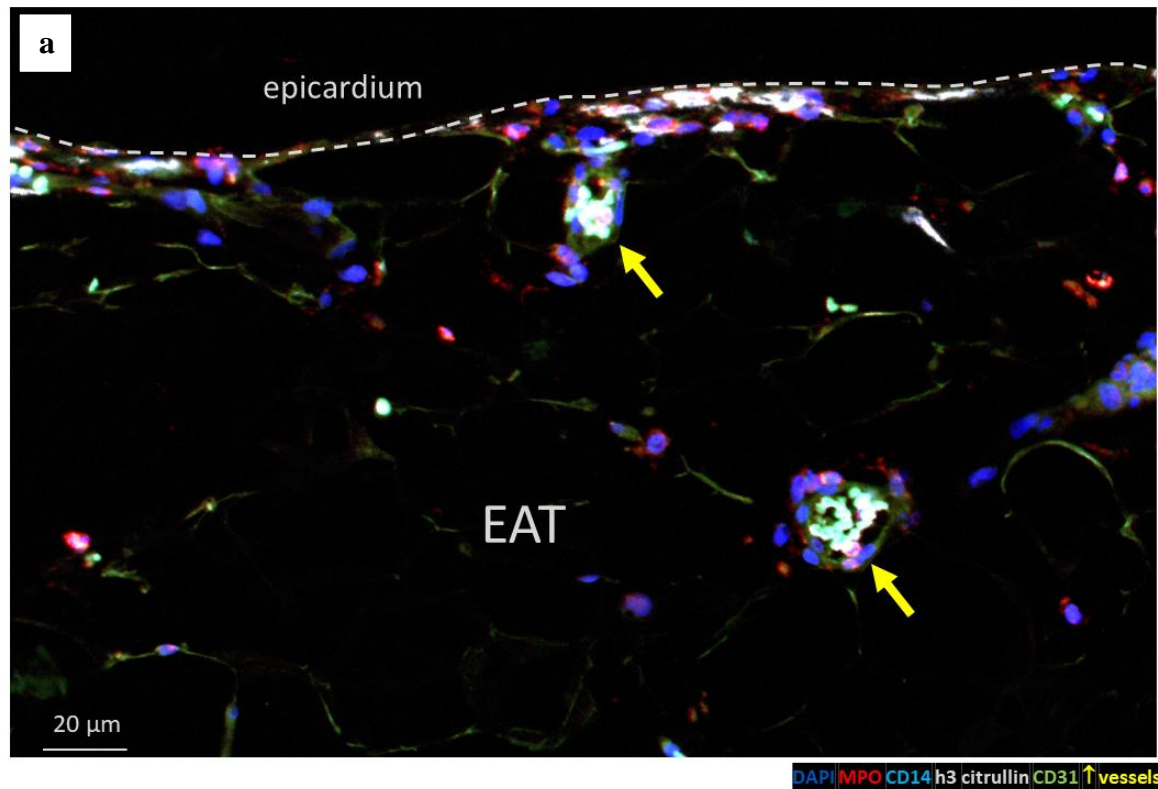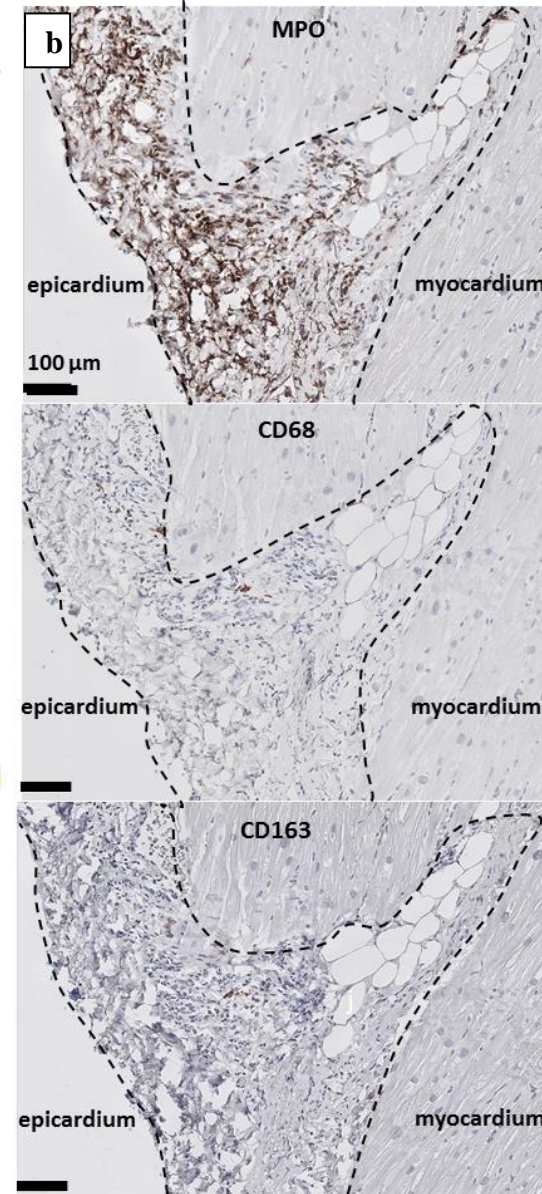

a) Typical example of EAT from a persistent AF patients co-stained for: MPO, neutrophil extracellular traps (NETs, with web-like h3citrulline positive structures that co-localize with MPO positive, CD14 negative cells), and endothelial CD31 to assess intra/extravascular location of MPO and NETs. Vessels are indicated with yellow arrows. b) Serial sections immunohistochemically stained for MPO, CD68 and CD163.

**Table 1.** Gene primer-sets

| Gene           | Forward                             | Reverse                               |
|----------------|-------------------------------------|---------------------------------------|
| <i>hCOL1A1</i> | 5”-<br>CTGAGCCAGCAGATCGAGAA-<br>3”, | 3”-<br>ATCCAGTASTCTCCACTCTTCCA-<br>5” |
| <i>hFN1</i>    | 5”-<br>CTGCAAGCCCATAGCTGAGA-<br>3”  | 3”-GAAGTGCAAGTGATGCGTCC-<br>5”        |
| <i>hHRPT</i>   | 5-<br>“CCCTGGCGTCGTGATTAGTGA-<br>3” | 3”-<br>“AGAGGGCTASAATGTGATGGC-<br>5”  |



**Table 2.** Patient characteristics: EAT secretome - fibroblast culture study

| <b>Variable</b>                                 | <b>Persistent AF<br/>(n=11)</b> | <b>Paroxysmal<br/>AF (n=3)</b> | <b>Without AF<br/>(n=6)</b> | <b>p-<br/>value</b> |
|-------------------------------------------------|---------------------------------|--------------------------------|-----------------------------|---------------------|
| <b>Surgery type</b>                             | Thoracoscopic<br>AF ablation    | Thoracoscopic<br>AF ablation   | CABG                        | N/A                 |
| <b>Male sex n (%)</b>                           | 11 (100)                        | 3 (100)                        | 6 (100)                     | 1.0                 |
| <b>Age [IQR]</b>                                | 63.0 [11.0]                     | 54.0 [N/A]                     | 70.0 [7.5]                  | 0.04                |
| <b>BMI (<math>\pm</math>SD)</b>                 | 28.8 (3.5)                      | 28.7 (2.7)                     | 27.75 (1.6)                 | 0.77                |
| <b>LAVI % [IQR]</b>                             | 41.9 [22]                       | 29.3 [NA]                      | 33.0 [10]                   | <0.01*              |
| <b>LVEF% [IQR]</b>                              | 54.1 [6]                        | NA                             | 55.7 [24]                   | 0.63*               |
| <b>CHA<sub>2</sub>DS<sub>2</sub>-VASc [IQR]</b> | 1 [2]                           | 0 [2]                          | 3 [2]                       | 0.02                |
| <b>Hypertension n (%)</b>                       | 3 (27)                          | 1 (33)                         | 3 (50)                      | 0.83                |
| <b>Diabetes n (%)</b>                           | 0 (0)                           | 1 (33)                         | 4 (67)                      | <0.01               |
| <b>Vascular disease n (%)</b>                   | 0 (0)                           | 0 (0)                          | 6 (100)                     | <0.01               |
| <b>Stroke n (%)</b>                             | 2 (18)                          | 0 (0)                          | 1(17)                       | 0.73                |
| <b>Congestive heartfailure n (%)</b>            | 1 (9)                           | 0 (0)                          | 0 (0)                       | 0.65                |
| <b>CRP [IQR]</b>                                | 1.7 (2.2)                       | 0.8 [NA]                       | 0.4 [15.6]                  | 0.69                |
| <b>Leukocytes 10–9/L (<math>\pm</math>SD)</b>   | 7.8 (0.20)                      | 6.43 (1.62)                    | 8.12 (1.86)                 | 0.16                |
| <b>Thrombocytes 10–9/L (<math>\pm</math>SD)</b> | 260.18 (42.44)                  | 219.33 (16.62)                 | 262.6 (43.63)               | 0.28                |
| <b>OAC n (%)</b>                                | 11 (100)                        | 3 (100)                        | 0 (0)                       | <0.01               |
| <b>Antiplatelet n (%)</b>                       | 0 (0)                           | 0 (0)                          | 6 (100)                     | <0.01               |
| <b>Statins n (%)</b>                            | 1 (9)                           | 1 (33)                         | 6 (100)                     | <0.01               |

CABG, coronary artery bypass grafting; BMI, body mass index, LAVI, left atrial volume index; LVEF, left ventricular ejection fraction; NA, not available; N/A, not applicable; OAC, oral anticoagulant; PAF, paroxysmal AF; peAF, persistent AF; \*t-test between peAF versus non-AF instead of three group ANOVA due to low number of PAF patients.

**Table 3.** Top 50 most differentially expressed proteins in AF EAT secretome

| protein name | peAF | peAF | peAF | non AF | non AF | non AF | fold change | p-value | BH corrected p-value 0,25 |
|--------------|------|------|------|--------|--------|--------|-------------|---------|---------------------------|
| ACADVL       | 2    | 6    | 1    | 0      | 0      | 0      | N/A         | 0,0056  | 0,0049                    |
| MAOA         | 1    | 3    | 2    | 0      | 0      | 0      | N/A         | 0,0068  | 0,0062                    |
| MPO          | 26   | 19   | 8    | 0      | 0      | 3      | 18,08       | 0,0026  | <b>0,0028</b>             |
| ADSSL1       | 4    | 7    | 3    | 2      | 0      | 0      | 8,25        | 0,0055  | 0,0048                    |
| EIF4G2       | 6    | 3    | 5    | 0      | 2      | 0      | 6,60        | 0,0075  | 0,0069                    |
| CKAP4        | 6    | 6    | 5    | 3      | 0      | 0      | 6,02        | 0,0068  | 0,0060                    |
| ALDH7A1      | 5    | 6    | 7    | 0      | 2      | 1      | 5,90        | 0,0029  | <b>0,0030</b>             |
| ECH1         | 7    | 10   | 3    | 0      | 2      | 2      | 5,10        | 0,0080  | 0,0072                    |
| GLUD1        | 11   | 19   | 8    | 4      | 2      | 3      | 3,99        | 0,0030  | <b>0,0032</b>             |
| AIFM1        | 10   | 7    | 5    | 2      | 1      | 3      | 3,82        | 0,0066  | 0,0058                    |
| CA2          | 23   | 14   | 17   | 5      | 5      | 6      | 3,33        | 0,0006  | <b>0,0011</b>             |
| CA1          | 67   | 40   | 57   | 18     | 13     | 20     | 3,18        | 0,0003  | <b>0,0005</b>             |
| SERPINH1     | 9    | 7    | 7    | 2      | 4      | 2      | 2,99        | 0,0068  | 0,0063                    |
| EPHX1        | 17   | 20   | 13   | 10     | 4      | 4      | 2,78        | 0,0043  | 0,0037                    |
| PSMD12       | 9    | 12   | 14   | 7      | 2      | 4      | 2,63        | 0,0087  | 0,0077                    |
| HBD          | 40   | 33   | 37   | 13     | 12     | 21     | 2,39        | 0,0006  | <b>0,0012</b>             |
| HBB          | 488  | 526  | 687  | 220    | 193    | 315    | 2,34        | 0,0007  | <b>0,0013</b>             |
| HBA1         | 440  | 368  | 432  | 135    | 161    | 247    | 2,29        | 0,0004  | <b>0,0007</b>             |
| HSPA1B       | 160  | 216  | 158  | 88     | 72     | 99     | 2,06        | 0,0005  | <b>0,0009</b>             |
| ILK          | 41   | 27   | 31   | 16     | 13     | 20     | 2,00        | 0,0029  | <b>0,0029</b>             |
| HRG          | 67   | 59   | 65   | 31     | 30     | 36     | 1,98        | 0,0001  | <b>0,0004</b>             |
| VTN          | 30   | 26   | 23   | 13     | 15     | 17     | 1,73        | 0,0054  | 0,0045                    |
| AHCY         | 26   | 32   | 31   | 16     | 19     | 17     | 1,71        | 0,0049  | 0,0042                    |
| ANXA11       | 30   | 24   | 27   | 15     | 17     | 19     | 1,60        | 0,0091  | 0,0080                    |
| HSPA8        | 206  | 233  | 171  | 150    | 105    | 143    | 1,53        | 0,0064  | 0,0057                    |
| HSPG2        | 235  | 226  | 211  | 143    | 159    | 155    | 1,47        | 0,0001  | <b>0,0003</b>             |
| GSN          | 161  | 127  | 123  | 180    | 174    | 189    | -1,32       | 0,0061  | 0,0054                    |
| VCP          | 135  | 147  | 133  | 182    | 189    | 177    | -1,33       | 0,0006  | <b>0,0010</b>             |
| NCL          | 57   | 75   | 49   | 88     | 100    | 80     | -1,48       | 0,0052  | 0,0044                    |
| C3           | 707  | 367  | 576  | 865    | 944    | 900    | -1,64       | 0,0063  | 0,0055                    |
| GDI2         | 35   | 39   | 51   | 69     | 76     | 65     | -1,67       | 0,0011  | <b>0,0017</b>             |
| CFB          | 105  | 62   | 71   | 144    | 136    | 146    | -1,79       | 0,0014  | <b>0,0019</b>             |
| MAP4         | 45   | 22   | 41   | 74     | 52     | 69     | -1,81       | 0,0099  | 0,0083                    |
| SERPINF1     | 19   | 17   | 14   | 40     | 22     | 31     | -1,88       | 0,0095  | 0,0082                    |
| KLKB1        | 22   | 12   | 13   | 28     | 31     | 27     | -1,88       | 0,0059  | 0,0052                    |
| TAGLN2       | 19   | 22   | 19   | 35     | 46     | 33     | -1,91       | 0,0014  | <b>0,0020</b>             |
| CAPN2        | 13   | 9    | 9    | 27     | 16     | 19     | -2,03       | 0,0092  | 0,0081                    |
| RRBP1        | 70   | 40   | 51   | 135    | 107    | 101    | -2,12       | 0,0011  | <b>0,0016</b>             |
| COPB2        | 13   | 4    | 15   | 18     | 24     | 25     | -2,12       | 0,0082  | 0,0074                    |
| ITIH4        | 67   | 24   | 40   | 72     | 108    | 100    | -2,13       | 0,0100  | 0,0085                    |
| ENO1         | 83   | 104  | 86   | 191    | 225    | 185    | -2,21       | 0,0000  | <b>0,0002</b>             |
| C2           | 21   | 7    | 10   | 31     | 28     | 29     | -2,31       | 0,0045  | 0,0038                    |
| CD14         | 7    | 4    | 7    | 13     | 15     | 14     | -2,31       | 0,0051  | 0,0043                    |
| SMARCC2      | 8    | 4    | 3    | 16     | 12     | 13     | -2,53       | 0,0056  | 0,0050                    |
| LRG1         | 5    | 12   | 9    | 20     | 21     | 24     | -2,54       | 0,0011  | <b>0,0018</b>             |
| AEBP1        | 9    | 4    | 3    | 17     | 16     | 11     | -2,58       | 0,0078  | 0,0071                    |
| SERPINB9     | 7    | 3    | 5    | 9      | 16     | 12     | -2,60       | 0,0088  | 0,0078                    |
| DBN1         | 12   | 3    | 7    | 24     | 15     | 18     | -2,64       | 0,0077  | 0,0070                    |
| SEC23A       | 13   | 6    | 5    | 22     | 24     | 17     | -2,72       | 0,0038  | 0,0036                    |
| AP1B1        | 5    | 1    | 7    | 15     | 13     | 10     | -2,86       | 0,0046  | 0,0040                    |

Proteins were first hierarchically listed based on p-value, thereafter according to fold change. N/A, not applicable: indicates only expressed in either AF or non-AF phenotype. Significant Benjamini-Hochberg corrected p-values (FDR0,25) are presented in **bold**.

**Table 4.** Top 50 most differentially expressed proteins in AF EAT

| protein name | peAF | peAF | peAF | non AF | non AF | non AF | fold change | p-value | BH corrected p-value 0,25 |
|--------------|------|------|------|--------|--------|--------|-------------|---------|---------------------------|
| SLC27A6      | 0    | 0    | 0    | 3      | 4      | 7      | -N/A        | 0,0013  | <b>0,0024</b>             |
| HSD17B8      | 0    | 0    | 0    | 4      | 2      | 7      | -N/A        | 0,0015  | <b>0,0026</b>             |
| GORASP2      | 0    | 0    | 0    | 1      | 4      | 5      | -N/A        | 0,0034  | <b>0,0054</b>             |
| SGCA         | 0    | 0    | 0    | 7      | 0      | 6      | -N/A        | 0,0086  | <b>0,0096</b>             |
| SHTN1        | 0    | 0    | 0    | 4      | 0      | 3      | -N/A        | 0,0094  | <b>0,0104</b>             |
| CD5L         | 7    | 3    | 4    | 0      | 0      | 0      | N/A         | 0,0009  | <b>0,0015</b>             |
| IGKV1-6      | 5    | 5    | 3    | 0      | 0      | 0      | N/A         | 0,0009  | <b>0,0016</b>             |
| MELTF        | 3    | 5    | 4    | 0      | 0      | 0      | N/A         | 0,0013  | <b>0,0022</b>             |
| TMED4        | 4    | 3    | 3    | 0      | 0      | 0      | N/A         | 0,0018  | <b>0,0030</b>             |
| ACOX1        | 5    | 2    | 4    | 0      | 0      | 0      | N/A         | 0,0024  | <b>0,0039</b>             |
| HBQ1         | 4    | 2    | 6    | 0      | 0      | 0      | N/A         | 0,0026  | <b>0,0041</b>             |
| TWF1         | 3    | 3    | 3    | 0      | 0      | 0      | N/A         | 0,0030  | <b>0,0044</b>             |
| AZU1         | 21   | 3    | 6    | 0      | 0      | 0      | N/A         | 0,0032  | <b>0,0049</b>             |
| MMP9         | 51   | 3    | 10   | 0      | 0      | 0      | N/A         | 0,0045  | <b>0,0060</b>             |
| DMTN         | 1    | 3    | 4    | 0      | 0      | 0      | N/A         | 0,0045  | <b>0,0062</b>             |
| MPP1         | 3    | 2    | 3    | 0      | 0      | 0      | N/A         | 0,0064  | <b>0,0076</b>             |
| AKT2         | 3    | 3    | 1    | 0      | 0      | 0      | N/A         | 0,0064  | <b>0,0077</b>             |
| PCK1         | 1    | 3    | 3    | 0      | 0      | 0      | N/A         | 0,0065  | <b>0,0078</b>             |
| ITGB2        | 18   | 2    | 4    | 0      | 0      | 0      | N/A         | 0,0069  | <b>0,0081</b>             |
| IGLV2-14     | 4    | 2    | 1    | 0      | 0      | 0      | N/A         | 0,0082  | <b>0,0093</b>             |
| OLFM4        | 17   | 2    | 3    | 0      | 0      | 0      | N/A         | 0,0089  | <b>0,0100</b>             |
| RAB27A       | 7    | 2    | 1    | 0      | 0      | 0      | N/A         | 0,0091  | <b>0,0103</b>             |
| SPTA1        | 56   | 14   | 86   | 4      | 0      | 0      | 38,98051894 | 0,0051  | <b>0,0071</b>             |
| MPO          | 148  | 42   | 52   | 3      | 4      | 4      | 21,36705511 | 0,0047  | <b>0,0064</b>             |
| LCN2         | 25   | 5    | 16   | 1      | 0      | 1      | 21,08580948 | 0,0081  | <b>0,0092</b>             |
| RDH5         | 4    | 8    | 9    | 1      | 0      | 0      | 15,30661973 | 0,0021  | <b>0,0034</b>             |
| NQO2         | 9    | 15   | 13   | 3      | 0      | 1      | 10,75696085 | 0,0005  | <b>0,0009</b>             |
| ANPEP        | 4    | 5    | 3    | 1      | 0      | 0      | 8,589389036 | 0,0099  | <b>0,0110</b>             |
| SLC2A1       | 5    | 3    | 7    | 1      | 0      | 1      | 7,226525319 | 0,0080  | <b>0,0091</b>             |
| PTGES3       | 5    | 6    | 4    | 3      | 0      | 0      | 5,911224944 | 0,0099  | <b>0,0109</b>             |
| KPRP         | 5    | 3    | 4    | 0      | 2      | 0      | 5,653900541 | 0,0086  | <b>0,0095</b>             |
| HRG          | 31   | 20   | 15   | 5      | 4      | 3      | 5,34856048  | 0,0012  | <b>0,0020</b>             |
| PML          | 10   | 12   | 9    | 3      | 0      | 3      | 5,240963876 | 0,0020  | <b>0,0032</b>             |
| TGM3         | 7    | 3    | 9    | 1      | 2      | 0      | 5,155304095 | 0,0096  | <b>0,0107</b>             |
| RETSAT       | 18   | 17   | 19   | 5      | 4      | 3      | 4,119833808 | 0,0004  | <b>0,0006</b>             |
| IGHM         | 93   | 67   | 72   | 51     | 4      | 6      | 3,809757947 | 0,0060  | <b>0,0072</b>             |
| PYGL         | 21   | 21   | 24   | 7      | 4      | 7      | 3,690552398 | 0,0003  | <b>0,0004</b>             |
| POR          | 17   | 12   | 13   | 5      | 2      | 5      | 3,37324035  | 0,0023  | <b>0,0038</b>             |
| SH3GLB1      | 7    | 6    | 9    | 1      | 4      | 1      | 3,224566927 | 0,0095  | <b>0,0105</b>             |
| CA1          | 94   | 86   | 143  | 44     | 45     | 13     | 3,195566218 | 0,0038  | <b>0,0056</b>             |
| F13A1        | 41   | 30   | 61   | 20     | 9      | 14     | 3,046686561 | 0,0032  | <b>0,0050</b>             |
| ACSL1        | 147  | 259  | 179  | 96     | 54     | 62     | 2,763229013 | 0,0021  | <b>0,0035</b>             |
| HBB          | 1033 | 858  | 1049 | 498    | 463    | 122    | 2,714733367 | 0,0039  | <b>0,0057</b>             |
| IQGAP1       | 34   | 41   | 55   | 11     | 16     | 23     | 2,604611704 | 0,0031  | <b>0,0046</b>             |
| HSPA12A      | 26   | 24   | 31   | 13     | 9      | 10     | 2,520469844 | 0,0010  | <b>0,0018</b>             |
| HBA1         | 781  | 726  | 941  | 495    | 360    | 135    | 2,472575705 | 0,0048  | <b>0,0067</b>             |
| A2M          | 240  | 196  | 290  | 133    | 110    | 51     | 2,463911023 | 0,0033  | <b>0,0052</b>             |
| ITIH1        | 37   | 32   | 35   | 15     | 4      | 23     | 2,444318184 | 0,0068  | <b>0,0079</b>             |
| SERPING1     | 38   | 32   | 31   | 15     | 11     | 18     | 2,322310824 | 0,0010  | <b>0,0017</b>             |
| ACTR3        | 17   | 17   | 24   | 9      | 9      | 8      | 2,220283362 | 0,0051  | <b>0,0069</b>             |

Proteins were first hierarchically listed based on p-value, thereafter according to fold change. N/A, not applicable: indicates only expressed in either AF or non-AF phenotype. Significant Benjamini-Hogberg corrected p-values (FDR0,25) are presented in **bold**.
